# Supplementary material for: The H3K9 methyltransferase SETDB1 maintains female identity in Drosophila germ cells
Source: PubMed Central journal article supplement (PMC6175928; doi:10.1038/s41467-018-06697-x), 2018-10-08
Supplement: 41467_2018_6697_MOESM3_ESM.pdf [file 41467_2018_6697_MOESM3_ESM.pdf]

## Description of Additional Supplementary Files

File Name: Supplementary Data 1

Description: Genes upregulated at least 2-fold in setdb1 GLKD ovaries.

File Name: Supplementary Data 2

Description: Genes upregulated at least 2-fold in wde GLKD ovaries.

File Name: Supplementary Data 3

Description: Genes upregulated at least 2-fold in hp1a GLKD ovaries.

File Name: Supplementary Data 4

Description: Genes downregulated at least 2-fold in setdb1 GLKD ovaries.

File Name: Supplementary Data 5

Description: Genes downregulated at least 2-fold in wde GLKD ovaries.

File Name: Supplementary Data 6

Description: Genes downregulated at least 2-fold in hp1a GLKD ovaries.

File Name: Supplementary Data 7

Description: Many of the genes ectopically expressed in setdb1 GLKD ovaries are normally expressed in testis.

File Name: Supplementary Data 8

Description: Many of the genes ectopically expressed in wde GLKD ovaries are normally expressed in testis.

File Name: Supplementary Data 9

Description: Many of the genes ectopically expressed in hp1a GLKD ovaries are normally expressed in testis.
